# Supplementary material for: Influence of Serratia marcescens and Rhodococcus rhodnii on the Humoral Immunity of Rhodnius prolixus
Source: MDPI journal article supplement (doi:10.3390/ijms222010901), 2021-10-09
Supplement: s1 [file s1]

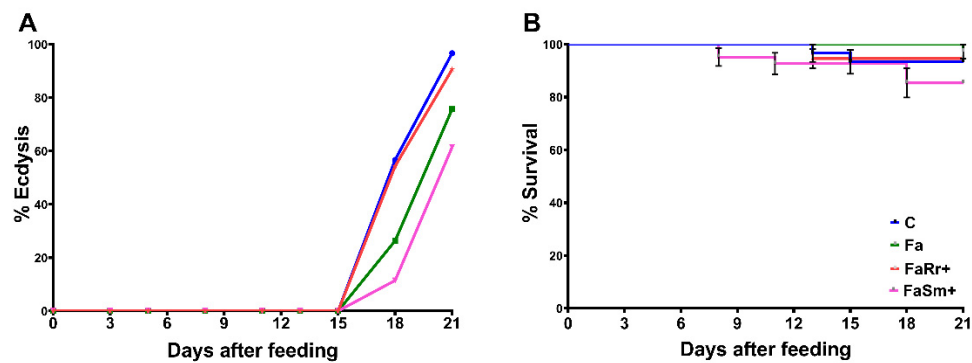

**Figure S1.** Survival and molting of 5th instar nymphs of *Rhodnius prolixus* recolonized with *Rhodococcus rhodnii* or *Serratia marcescens*. Ecdysis (A) and survival (B). The insects were previously treated with antibiotics as nymphs of the 4th instar, except for the control group and, after molting, recolonized with *Rhodococcus rhodnii* or *Serratia marcescens* by adding the bacteria to the blood feeding. Antibiotics treatment of 4th instar consisted of ampicillin, penicillin, and hygromycin with final concentrations of 150, 150, and 1 µg/mL, respectively, added in defibrinated rabbit blood. For recolonization with *R. rhodnii* or *S. marcescens*, a concentration of  $10^3$  and  $10^4$  cells/mL was added to the blood meal, respectively. Legend: control (C, in blue); antibiotic control (A in green); *R. rhodnii* (FaRr+, in red); *S. marcescens* (FaSm+ in pink). Percentage of 2 experiments using for each group 3 pools containing 10 insects each,  $n = 6$ , representing 60 insects. The log-rank (Mantel–Cox) test was performed for survival statistics analysis, ns.

**Table S1.** Primers used in RT-qPCR experiments and additional information.

| Primers               | Sequence (5'-3')            | GenBank Accession Number | Amplicon Size (pb) | References |
|-----------------------|-----------------------------|--------------------------|--------------------|------------|
| $\alpha$ -tubulin-F * | TTTCCTCGATCACTGCTTCC        | ACPB02030650             | 129                | [1]        |
| $\alpha$ -tubulin-R * | CGGAAATAACTGGGGCATAA        |                          |                    |            |
| GAPDH-F *             | GATGGCGCCCAGTACATAGT        | ACPB02038754             | 111                | [1]        |
| GAPDH-R *             | AGCTGACGGGGCTGTTATTA        |                          |                    |            |
| 18S-R.prolixus-F *    | TCCTTCGTGCTAGGAATTGG        |                          | 105                | [1]        |
| 18S-R.prolixus-R *    | GTACAAAGGGCAGGGACGTA        |                          |                    |            |
| DefA-F                | GAATACTCCACTCAACCGCAAC      | AY196130                 | 295                | [2]        |
| DefA-R                | TAGTTCCTTTACATCGGCCA        |                          |                    |            |
| DefC-F                | CAGTACAGTCCTAATACCTAGCC     | AY196132                 | 300                | [2]        |
| DefC-R                | CAGTTCCTACGCAACGGCCT        |                          |                    |            |
| Prol-F                | CTATAACGAGTGAAGTATAAGACAA   | EU448993                 | 406                | [2]        |
| Prol-R                | GTGTTTAATGGCGGTAACAAATTAC   |                          |                    |            |
| NOS-F                 | AATG GGCACCAGAAGTGTTT       | U59389                   | 238                | [3]        |
| NOS-R                 | GTTGCCGATTCCACAAATCT        |                          |                    |            |
| 16S-S.Marcescens-F    | GGTGAGCTTAATACGTTTCATCAATTG | AJ233431                 | 179                | [4]        |
| 16S-S.Marcescens-R    | GCAGTTCCCAGGTTGAGCC         |                          |                    |            |
| 16S-R.rhodnii-F       | CACTGGTTGCATGGCCTGGTG       | EU650780                 | 418                | [2]        |
| 16S-R.rhodnii-R       | TGAGCTGTGGGATTTCACAGAC      |                          |                    |            |

\* Reference genes.

## References

- Paim, R.M.M.; Araujo, R.N.; Lehane, M.J.; Gontijo, N.F.; Pereira, M.H. Application of RNA interference in triatomine (Hemiptera: Reduviidae) studies. *Insect Sci.* **2012**, *20*, 40–52, doi:10.1111/j.1744-7917.2012.01540.x.
- Vieira, C.S.; Waniek, P.J.; Mattos, D.P.; Castro, D.P.; Mello, C.B.; Ratcliffe, N.A.; Garcia, E.S.; Azambuja, P. Humoral responses in *Rhodnius prolixus*: Bacterial feeding induces differential patterns of antibacterial activity and enhances mRNA levels of antimicrobial peptides in the midgut. *Parasit. Vectors* **2014**, *7*, 232, doi:10.1186/1756-3305-7-232.
- Batista, K.; Vieira, C.S.; Florentino, E.B.; Caruso, K.F.B.; Teixeira, P.T.P.; Moraes, C.D.S.; Genta, F.A.; de Azambuja, P.; de Castro, D.P. Nitric oxide effects on *Rhodnius prolixus*'s immune responses, gut microbiota and *Trypanosoma cruzi* development. *J. Insect Physiol.* **2020**, *126*, 104100, doi:10.1016/j.jinsphys.2020.104100.

4. Saikaly, P.E.; Barlaz, M.A.; de Los Reyes, F.L., 3rd. Development of quantitative real-time PCR assays for detection and quantification of surrogate biological warfare agents in building debris and leachate. *Appl. Environ. Microbiol.* **2007**, *73*, 6557–6565, doi:10.1128/AEM.00779-07.
